# Supplementary material for: Bidentate N,O-prolinate ruthenium benzylidene catalyst highly active in RCM of disubstituted dienes
Source: Royal Society of Chemistry journal article supplement (doi:10.1039/b704821a), 2007-01-01

## Supplementary Information

# Bidentate *N,O*-Prolinate Ruthenium benzylidene Catalyst Highly Active in RCM of Disubstituted Dienes

Joseph S. M. Samec and Robert H. Grubbs\*

### Contents

|                              |        |
|------------------------------|--------|
| experimental section         | p. 1-2 |
| characterization of <b>5</b> | p. 3-7 |

### Materials and Methods

All reactions were conducted in oven-dried glassware under an argon atmosphere using standard glove-box or Schlenk techniques. Solvents were purified by passage through alumina.<sup>1</sup> Resonances for NMR spectra are reported relative to Me<sub>4</sub>Si ( $\delta$  0.0) for <sup>1</sup>H and <sup>13</sup>C, and H<sub>3</sub>PO<sub>4</sub> ( $\delta$  0.0) for <sup>31</sup>P. Spectra are reported as follows: chemical shift ( $\delta$  ppm), multiplicity, coupling constant (Hz) and integration. L-proline and Cu(I)oxide were purchased from Aldrich and used without prior purification. Catalyst **1** was obtained from Materia, Inc.

### Experimental Procedures

**Synthesis of (PCy<sub>3</sub>)<sub>2</sub>(Pro)Cl<sub>2</sub>Ru(CHPh) (**5**).** A Schlenk flask was charged with (PCy<sub>3</sub>)<sub>2</sub>Cl<sub>2</sub>Ru(CHPh) (105 mg, 0.128 mmol), L-Proline (150 mg, 1.3 mmol), and Cu<sub>2</sub>O (500 mg, 3 mmol) and flushed with argon. Methylene chloride (10 mL) was canula transferred and the reaction was stirred for 5h at RT under argon during which time a color change from purple to green was observed. The reaction mixture was filtered through a glass-frit and concentrated in vacuo. The resulting solid was purified via column chromatography (TSI silica) using a gradient of ether and ethyl acetate to give **5** (32 mg, 40%) as a green solid. <sup>1</sup>H NMR (300 MHz, CD<sub>2</sub>Cl<sub>2</sub>)  $\delta$  19.62 (d, *J* = 11.2 Hz 1H), 8.07 (m, *J* = 7.3 Hz 2H), 7.68 (m, *J* = 7.3 Hz 1H), 7.50 (m, *J* = 7.6 Hz 2H), 3.58 (m, 1H), 3.43 (m, 1H), 2.80 (m, 1H), 2.50 (m, 1H), 2.19 (q, *J* = 9.9 Hz 4H), 1.09-2.10 (aliphatic region 33 H). <sup>13</sup>C NMR (75 MHz, CD<sub>2</sub>Cl<sub>2</sub>)  $\delta$  305.0 (d, *J* = 14.5 Hz), 185.7, 155.8, 131.9, 131.4, 126.5, 62.4, 51.0, 36.2 (d, *J* = 20.6 Hz), 31.9, 31.5, 29.8, 28.5 27.1. <sup>31</sup>P NMR (121 MHz, CD<sub>2</sub>Cl<sub>2</sub>)  $\delta$  43.88. IR (CH<sub>2</sub>Cl<sub>2</sub>)  $\nu$  = 3200, 2927, 2850, 1604, 1446 cm<sup>-1</sup>. FAB-HRMS: *m/z* calcd for C<sub>30</sub>H<sub>47</sub>NO<sub>2</sub>PRuCl 621.2077 found 621.2015.

**Kinetics.** The reactions were carried out using a standardized procedure recently reported by us.<sup>2</sup> All reactions were repeated at least once. From this data also the reaction-order was determined by plotting  $\ln$  conversion vs time. As can be seen in Figure 1, the reaction follows first-order kinetics over 4 half-lives.

**Figure 1.** First order determination of catalyst **5** in the RCM of diethyldiallyl malonate.

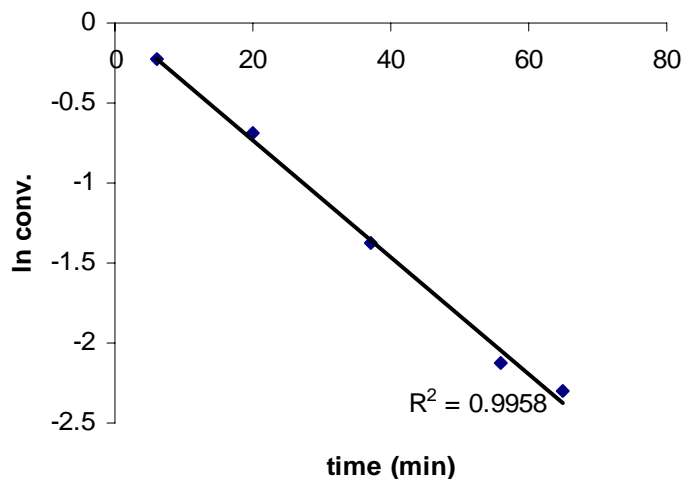

**RCM of disubstituted olefines in Table 1.** Catalyst **5** (2mM, 0.75 mL) was added to a screw-cap NMR tube inside a drybox. The substrate was added via syringe outside the box and the NMR-tube was directly inserted into a pre-warmed spectrometer (30 °C). The reactions were followed by <sup>1</sup>H NMR, monitoring known signals of the starting material and the product, to above 95% conversion.

<sup>1</sup> A. B. Pangborn, M. A. Giardello, R. H. Grubbs, R. K. Rosen, F. J. Timmers, *Organometallics* 1996, **15**, 518.

<sup>2</sup> T. Ritter, A. Hejl, A. G. Wenzel, T. W. Funk, R. H. Grubbs, *Organometallics*, 2006, **25**, 5740.

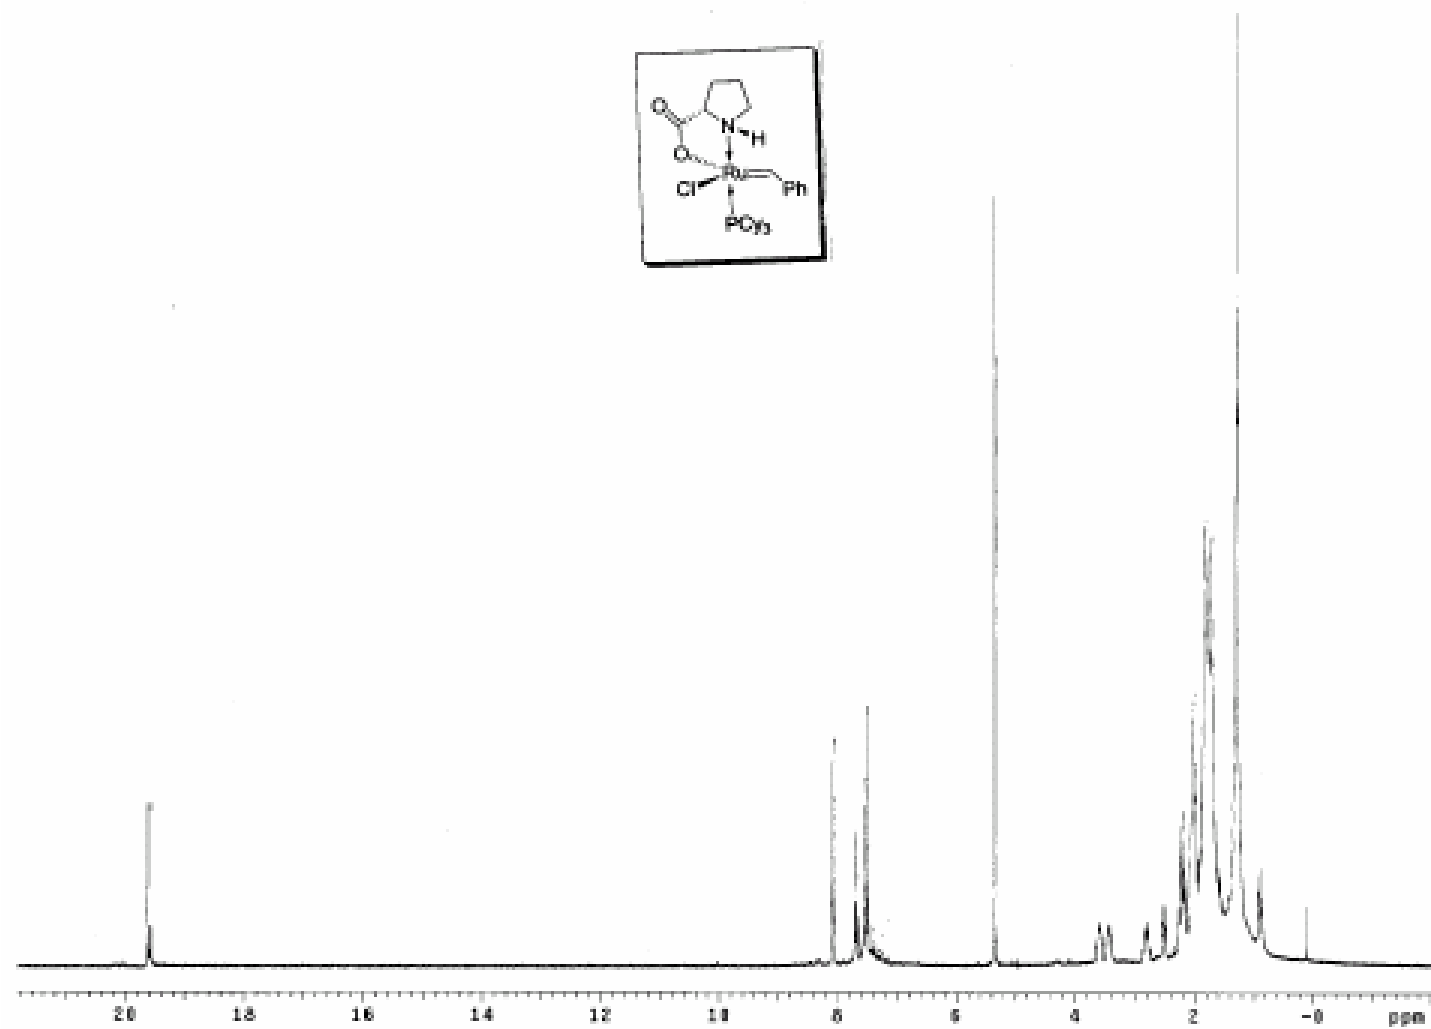

| INDEX | FREQUENCY | PPM     | HEIGHT |
|-------|-----------|---------|--------|
| 1     | 22010.320 | 205.170 | 0.3    |
| 2     | 22005.070 | 204.960 | 7.4    |
| 3     | 11700.000 | 100.000 | 7.6    |
| 4     | 7943.465  | 73.873  | 30.1   |
| 5     | 6600.800  | 60.500  | 19.0   |
| 6     | 3536.810  | 32.000  | 63.0   |
| 7     | 4704.350  | 42.351  | 7.5    |
| 8     | 6240.000  | 58.350  | 33.0   |
| 9     | 4021.410  | 35.990  | 63.5   |
| 10    | 1100.000  | 99.071  | 60.0   |
| 11    | 4107.250  | 35.007  | 50.0   |
| 12    | 4139.700  | 34.993  | 50.0   |
| 13    | 3740.000  | 30.000  | 13.3   |
| 14    | 3739.717  | 30.000  | 10.5   |
| 15    | 3400.000  | 32.000  | 6.4    |
| 16    | 3400.000  | 30.000  | 31.0   |
| 17    | 2370.000  | 20.000  | 10.5   |
| 18    | 2292.270  | 20.870  | 25.3   |
| 19    | 2100.000  | 19.010  | 17.4   |
| 20    | 2047.000  | 17.100  | 0.3    |

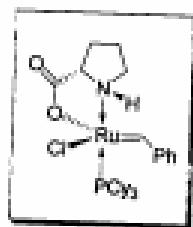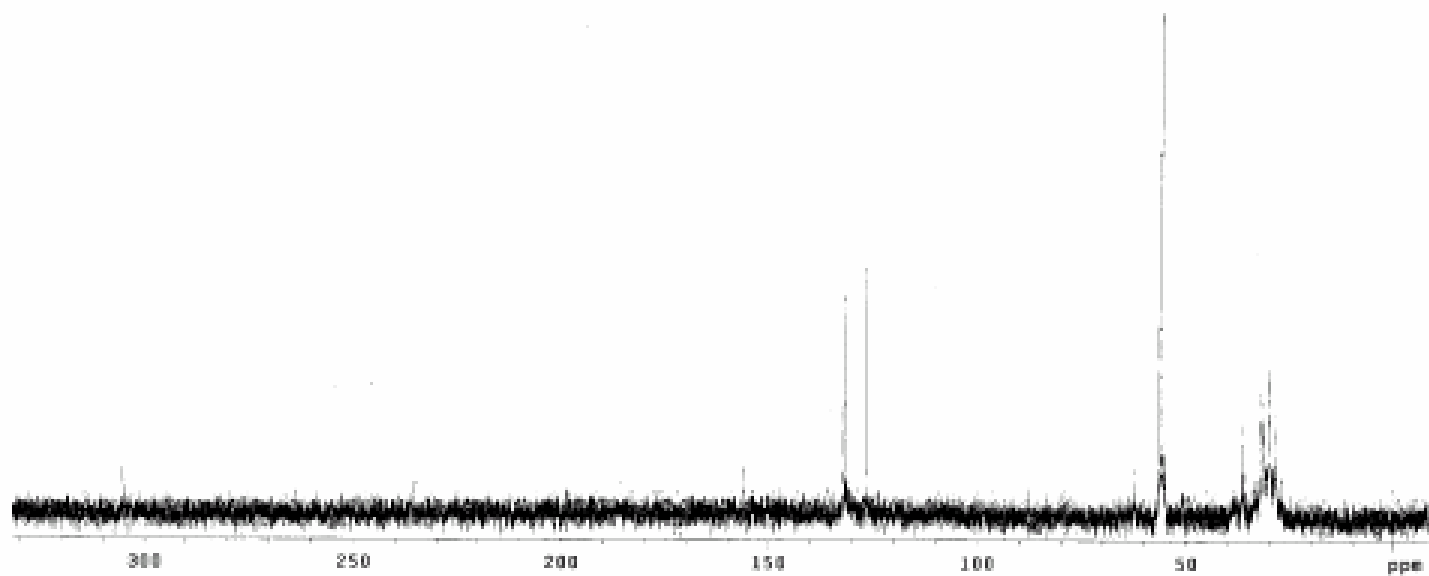

| INDEX | FREQUENCY | PPM    | HEIGHT |
|-------|-----------|--------|--------|
| 1     | 5004.847  | 43.883 | 186.6  |

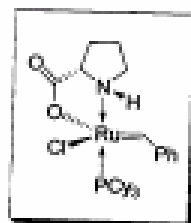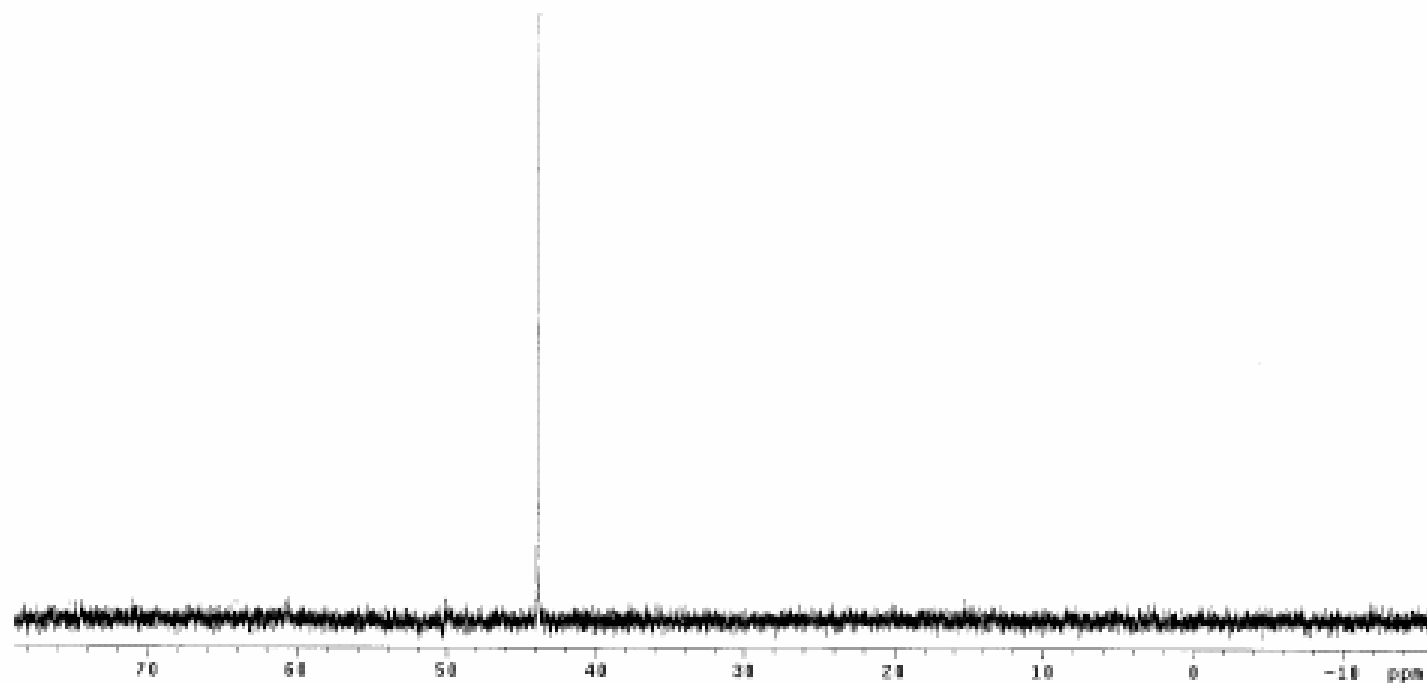

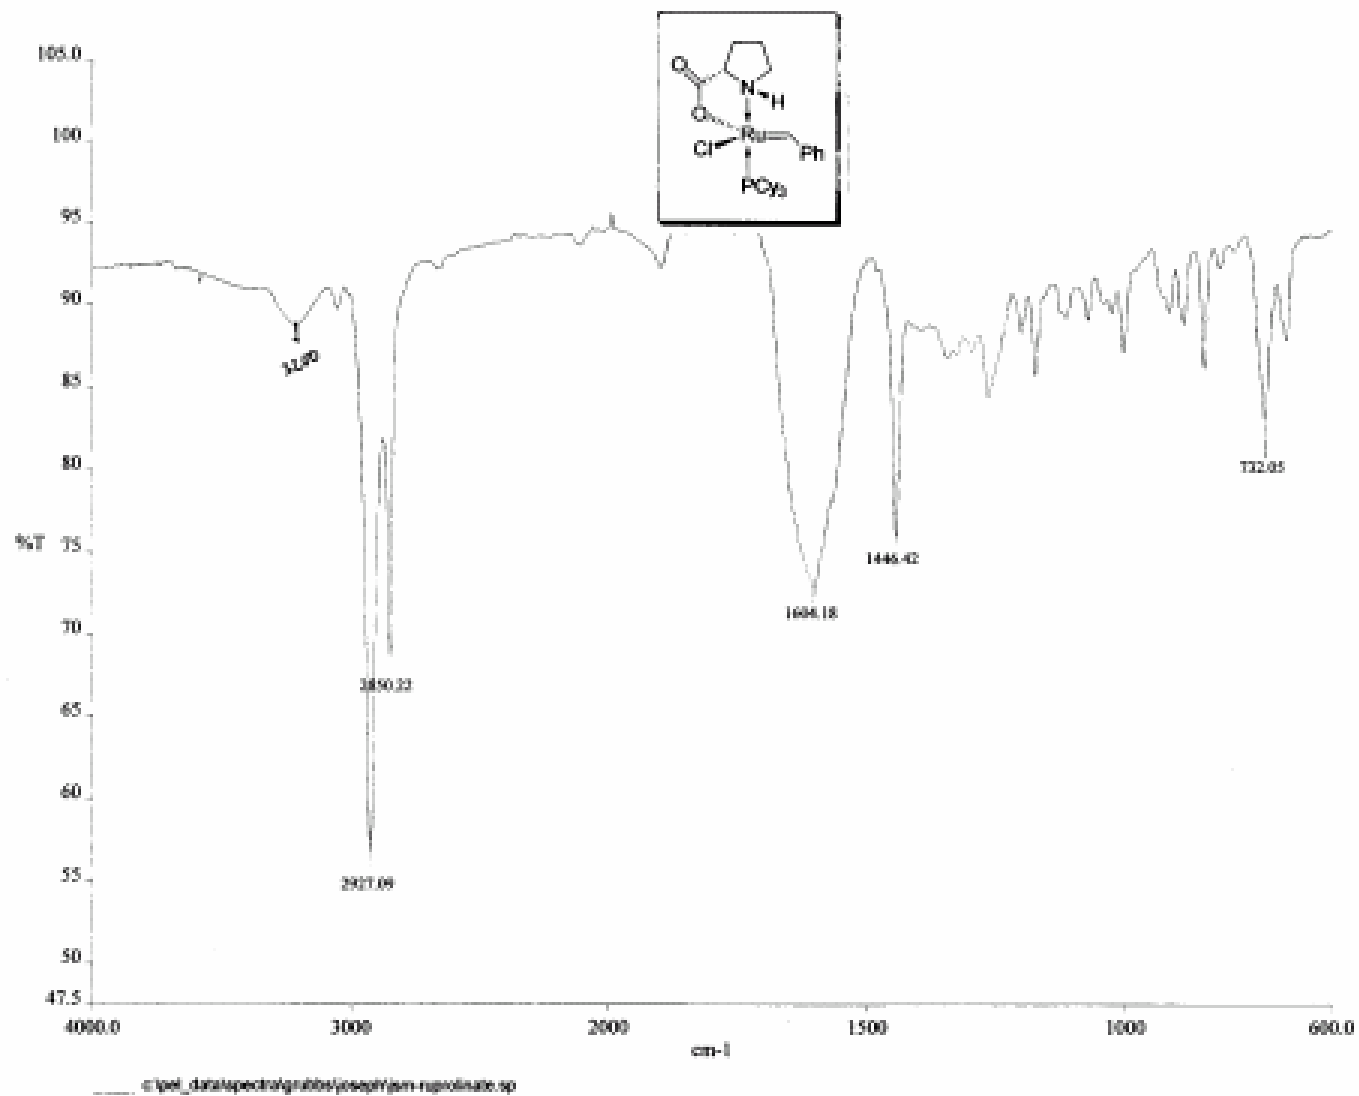

CALTECH

9/15/2006

Page 1

File: 091506-12 Date Run: 09-15-2006 (13:45:26)

Sample: m/z 585/621 HR FAB NOE

Instrument: JEOL MSRoute

Ionization mode: FAB+

Joseph Samec

Scan: 9-18

Base: m/z 621; 8.3%FS

TIC: 3701645

Selected Isotopes : C H N<sub>1-2</sub> O<sub>1-3</sub> P<sub>1-2</sub> Ru<sub>1-2</sub> Cl<sub>0-2</sub>

Error Limit : 10 ppm

| <u>Measured Mass</u> | <u>% Base</u> | <u>Formula</u>                                           | <u>Calculated Mass</u> | <u>Error</u> |
|----------------------|---------------|----------------------------------------------------------|------------------------|--------------|
| 621.2015             | 100.0%        | C <sub>34</sub> H <sub>47</sub> N O <sub>2</sub> P Ru Cl | 621.2077               | -10.0        |

Scan: 9-18

Base: m/z 621; 8.3%FS

TIC: 3701645

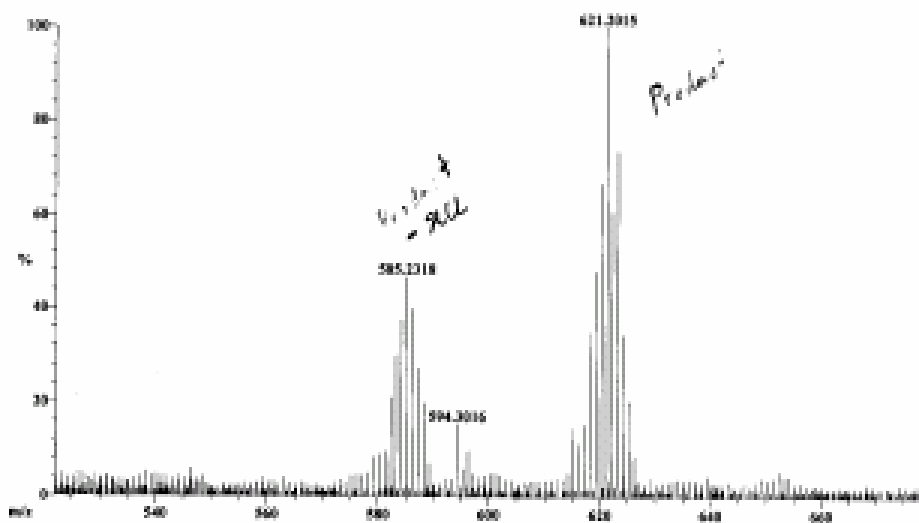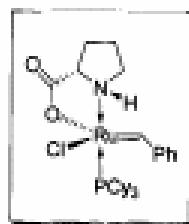

Supplement: b704821a.pdf [file b704821a.pdf]
